# Supplementary material for: Inexpensive ion-selective electrodes for the simultaneous monitoring of potassium and nitrate concentrations in nutrient solutions
Source: Royal Society of Chemistry journal article supplement (doi:10.1039/d1ay00956g), 2021-01-01
Supplement: d1ay00956g1.pdf [file d1ay00956g1.pdf]

## Supplementary information

### **Inexpensive ion-selective electrodes for the simultaneous monitoring of potassium and nitrate concentrations in nutrient solutions**

Marina Miras,<sup>a</sup> María Soledad García,<sup>a</sup> Vicente Martínez<sup>b</sup> and Joaquín Ángel Ortuño<sup>a\*</sup>

<sup>a</sup> Department of Analytical Chemistry, University of Murcia, Faculty of Chemistry, Spain.

<sup>b</sup> Department of Plant Nutrition, Centro de Edafología y Biología Aplicada del Segura, Consejo Superior de Investigaciones Científicas, Espinardo, Murcia 30100, Spain.

**Table S1** Concentration of major ions and ionic strength of nutrient solutions

| Sample | K <sup>+</sup><br>(mM) | Na <sup>+</sup><br>(mM) | Ca <sup>2+</sup><br>(mM) | Mg <sup>2+</sup><br>(mM) | NO <sub>3</sub> <sup>-</sup><br>(mM) | H <sub>2</sub> PO <sub>4</sub> <sup>-</sup><br>(mM) | Cl <sup>-</sup><br>(mM) | SO <sub>4</sub> <sup>2-</sup><br>(mM) | μ<br>(mM) |
|--------|------------------------|-------------------------|--------------------------|--------------------------|--------------------------------------|-----------------------------------------------------|-------------------------|---------------------------------------|-----------|
| 1      | 6.97                   | 0.49                    | 4.61                     | 1.16                     | 15.52                                | 0.85                                                | 0.35                    | 1.10                                  | 37.93     |
| 2      | 6.87                   | 0.48                    | 4.59                     | 1.16                     | 15.98                                | 0.85                                                | 0.34                    | 1.08                                  | 38.18     |
| 3      | 2.44                   | 0.95                    | 6.61                     | 1.47                     | 13.66                                | 0.34                                                | 0.22                    | 1.53                                  | 36.82     |
| 4      | 3.14                   | 0.85                    | 6.20                     | 1.40                     | 14.46                                | 0.50                                                | 0.24                    | 1.43                                  | 37.24     |
| 5      | 3.30                   | 0.86                    | 6.26                     | 1.42                     | 14.17                                | 0.53                                                | 0.20                    | 1.44                                  | 37.30     |
| 6      | 2.35                   | 0.95                    | 7.09                     | 1.53                     | 13.49                                | 0.49                                                | 0.15                    | 1.55                                  | 37.77     |
| 7      | 4.19                   | 0.80                    | 6.00                     | 1.41                     | 13.20                                | 0.59                                                | 0.20                    | 1.43                                  | 36.66     |
| 8      | 4.36                   | 0.79                    | 5.84                     | 1.33                     | 13.05                                | 0.60                                                | 0.18                    | 1.32                                  | 35.96     |
| 9      | 5.45                   | 0.78                    | 5.43                     | 1.15                     | 13.21                                | 0.70                                                | 0.19                    | 1.14                                  | 35.79     |
| 10     | 3.79                   | 0.84                    | 6.11                     | 1.30                     | 12.98                                | 0.60                                                | 0.15                    | 1.29                                  | 35.76     |
| 11     | 6.49                   | 0.70                    | 4.56                     | 1.09                     | 13.04                                | 0.79                                                | 0.31                    | 1.03                                  | 34.69     |
| 12     | 6.22                   | 0.67                    | 4.64                     | 1.09                     | 13.25                                | 0.78                                                | 0.30                    | 1.07                                  | 34.83     |
| 13     | 7.06                   | 0.86                    | 5.01                     | 1.15                     | 13.83                                | 0.86                                                | 0.34                    | 1.07                                  | 37.40     |
| 14     | 4.53                   | 0.97                    | 3.23                     | 0.73                     | 8.72                                 | 0.57                                                | 0.37                    | 0.68                                  | 24.44     |
| 15     | 6.85                   | 0.69                    | 4.62                     | 1.02                     | 13.44                                | 0.86                                                | 0.29                    | 0.96                                  | 35.34     |
| 16     | 6.38                   | 0.48                    | 3.79                     | 1.03                     | 14.64                                | 0.85                                                | 0.33                    | 1.07                                  | 34.45     |
| 17     | 4.94                   | 0.47                    | 2.92                     | 0.80                     | 10.86                                | 0.63                                                | 0.32                    | 0.82                                  | 26.31     |
| 18     | 3.36                   | 0.46                    | 1.98                     | 0.54                     | 6.87                                 | 0.41                                                | 0.32                    | 0.56                                  | 17.58     |
| 19     | 2.35                   | 0.97                    | 5.86                     | 1.38                     | 13.33                                | 0.42                                                | 0.16                    | 1.60                                  | 34.90     |
| 20     | 2.03                   | 0.98                    | 5.94                     | 1.36                     | 13.51                                | 0.41                                                | 0.16                    | 1.63                                  | 34.97     |
| 21     | 2.10                   | 0.96                    | 5.85                     | 1.37                     | 12.17                                | 0.41                                                | 0.15                    | 1.60                                  | 33.42     |
| 22     | 2.75                   | 0.88                    | 5.60                     | 1.32                     | 13.50                                | 0.50                                                | 0.17                    | 1.55                                  | 34.75     |
| 23     | 3.11                   | 0.87                    | 5.47                     | 1.35                     | 13.59                                | 0.47                                                | 0.15                    | 1.59                                  | 35.03     |
| 24     | 6.01                   | 0.72                    | 3.81                     | 0.98                     | 13.30                                | 0.77                                                | 0.30                    | 1.04                                  | 32.78     |
| 25     | 6.06                   | 0.59                    | 3.83                     | 1.03                     | 13.60                                | 0.81                                                | 0.32                    | 1.10                                  | 33.28     |
| 26     | 6.55                   | 0.87                    | 4.15                     | 1.03                     | 14.49                                | 0.85                                                | 0.33                    | 1.10                                  | 35.65     |
| 27     | 3.63                   | 1.10                    | 3.79                     | 1.18                     | 16.77                                | 0.37                                                | 0.15                    | 1.31                                  | 34.59     |
| 28     | 3.92                   | 1.11                    | 2.24                     | 0.74                     | 9.08                                 | 0.54                                                | 0.30                    | 0.79                                  | 22.49     |
| 29     | 5.85                   | 0.99                    | 3.30                     | 1.01                     | 14.71                                | 0.88                                                | 0.24                    | 1.05                                  | 33.40     |
| 30     | 4.06                   | 0.66                    | 2.22                     | 0.74                     | 9.60                                 | 0.58                                                | 0.27                    | 0.77                                  | 22.63     |
| 31     | 5.79                   | 0.36                    | 3.33                     | 0.76                     | 11.36                                | 0.50                                                | 0.21                    | 0.63                                  | 27.65     |
| 32     | 4.84                   | 1.05                    | 3.71                     | 0.83                     | 10.42                                | 0.45                                                | 0.14                    | 0.70                                  | 27.38     |
| 33     | 5.10                   | 1.16                    | 3.83                     | 0.88                     | 11.83                                | 0.46                                                | 0.21                    | 0.73                                  | 29.63     |
| 34     | 5.59                   | 1.16                    | 3.62                     | 0.86                     | 13.75                                | 0.48                                                | 0.13                    | 0.74                                  | 31.55     |
| 35     | 6.50                   | 1.34                    | 4.10                     | 1.03                     | 12.01                                | 0.54                                                | 0.15                    | 0.72                                  | 32.24     |
| 36     | 7.35                   | 1.45                    | 4.31                     | 1.12                     | 13.14                                | 0.51                                                | 0.20                    | 0.85                                  | 35.20     |
| 37     | 7.04                   | 1.48                    | 4.05                     | 1.12                     | 13.48                                | 0.54                                                | 0.13                    | 0.79                                  | 34.61     |
